# Supplementary material for: Prognostic Ability of Enhancer RNAs in Metastasis of Non-Small Cell Lung Cancer
Source: MDPI journal article supplement (doi:10.3390/molecules27134108), 2022-06-26
Supplement: s1 [file s1]

**Table S2.** The functions of RPPA and their regulatory relationship with PDEE.

| PDEE    | RPPA    | cor   | Function                                                                                                                                 |
|---------|---------|-------|------------------------------------------------------------------------------------------------------------------------------------------|
| ANXA8L1 | PAI1    | 0.368 | promotes glycolysis, thereby promoting the migration and chemotaxis of cancer cells                                                      |
| ANXA8L1 | EGFR    | 0.258 | plays an important role in the regulation the proliferation, differentiation, survival, motility, and of the tumor cells                 |
| CASTOR2 | TFRC    | 0.318 | promotes the proliferation and me-tastasis of cancer cells by upregulating the expression of AXIN2                                       |
| CYP4B1  | NAPSINA | 0.365 | reported as the specific clinical diagnosis indexes and prog-nostic markers for LUAD                                                     |
| GTF2H2C | TTF1    | 0.412 | reported as the specific clinical diagnosis indexes and prog-nostic markers for LUAD                                                     |
| PSMF1   | TFRC    | 0.251 | promotes the proliferation and me-tastasis of cancer cells by upregulating the expression of AXIN2                                       |
| TNS4    | CD49B   | 0.332 | shown as the cell-surface markers for the enrichment of a subpopulation of leiomyoma cells that possess stem/progenitor cell prop-erties |
