# Supplementary material for: Prognostic Ability of Enhancer RNAs in Metastasis of Non-Small Cell Lung Cancer
Source: MDPI journal article supplement (doi:10.3390/molecules27134108), 2022-06-26
Supplement: s1 [file s1]

**Table S1.** The target genes and drug response information of eRNAs.

The target genes information of ANXA8L1 (ENSR00000027547)

| Cancer Type | Enhancer Id     | Mid Location | Target Gene | Gene Location        | TSS | Distance | Rs     | -Log10FDR   |
|-------------|-----------------|--------------|-------------|----------------------|-----|----------|--------|-------------|
| KIRP        | ENSR00000027547 | 10:46363987  | AGAP4       | 10:45853875-45825594 | 10  | 538393   | 0.9006 | >15         |
| CHOL        | ENSR00000027547 | 10:46363987  | AGAP4       | 10:45853875-45825594 | 10  | 538393   | 0.7653 | 2.382482668 |
| KIRP        | ENSR00000027547 | 10:46363987  | GPRIN2      | 10:46555530-46549044 | 10  | 185057   | 0.6136 | >15         |
| THYM        | ENSR00000027547 | 10:46363987  | AGAP4       | 10:45853875-45825594 | 10  | 538393   | 0.5597 | >15         |
| MESO        | ENSR00000027547 | 10:46363987  | AGAP4       | 10:45853875-45825594 | 10  | 538393   | 0.4853 | 3.21925102  |

KIRP: Kidney renal papillary cell carcinoma.; CHOL: cholangiocarcinoma; THYM: Thymoma; MESO: Mesothelioma.

The target genes information of CASTOR2 (ENSR000000326772)

| Cancer Type | Enhancer Id      | Mid Location | Target Gene | Gene Location       | TSS | Distance | Rs     | -Log10FDR   |
|-------------|------------------|--------------|-------------|---------------------|-----|----------|--------|-------------|
| GBM         | ENSR000000326772 | 7:74933000   | SPDYE5      | 7:75493625-75504304 | 7   | 571304   | 0.6936 | >15         |
| GBM         | ENSR000000326772 | 7:74933000   | NSUN5P1     | 7:75410322-75416787 | 7   | 483787   | 0.5987 | >15         |
| GBM         | ENSR000000326772 | 7:74933000   | POM121C     | 7:75486271-75416787 | 7   | 483787   | 0.5017 | 7.775839251 |
| GBM         | ENSR000000326772 | 7:74933000   | GTF2IRD1    | 7:74453790-74602604 | 7   | 330396   | 0.4995 | 7.679481017 |
| GBM         | ENSR000000326772 | 7:74933000   | HIP1        | 7:75738962-75533300 | 7   | 600300   | 0.4755 | 6.820171556 |
| GBM         | ENSR000000326772 | 7:74933000   | GTF2IRD2    | 7:74851551-74796144 | 7   | 136856   | 0.4142 | 5.079213164 |
| GBM         | ENSR000000326772 | 7:74933000   | STAG3L1     | 7:75359194-75395383 | 7   | 462383   | 0.3807 | 4.269664945 |
| GBM         | ENSR000000326772 | 7:74933000   | CLIP2       | 7:74289475-74405943 | 7   | 527057   | 0.3572 | 3.753339682 |
| GBM         | ENSR000000326772 | 7:74933000   | GTF2IRD2B   | 7:75092573-75149817 | 7   | 216817   | 0.3488 | 3.621471434 |
| GBM         | ENSR000000326772 | 7:74933000   | STAG3L2     | 7:74890610-74882163 | 7   | 50837    | 0.3388 | 3.376917376 |
| GBM         | ENSR000000326772 | 7:74933000   | GTF2IP1     | 7:75237696-75185385 | 7   | 252385   | 0.3331 | 3.264306714 |
| GBM         | ENSR000000326772 | 7:74933000   | GTF2I       | 7:74657667-74760692 | 7   | 172308   | 0.3282 | 3.169741516 |

GBM: Glioblastoma multiforme.

The target genes information of CYP4B1 (ENSR00000251622)

| Cancer Type | Enhancer Id     | Mid Location | Target Gene | Gene Location       | TSS | Distance | Rs     | -Log10FDR   |
|-------------|-----------------|--------------|-------------|---------------------|-----|----------|--------|-------------|
| BRCA        | ENSR00000251622 | 1:46851100   | CYP4Z2P     | 1:46900437-46843095 | 1   | 8005     | 0.8972 | >15         |
| BLCA        | ENSR00000251622 | 1:46851100   | CYP4B1      | 1:46757838-46819413 | 1   | 31687    | 0.8601 | >15         |
| OV          | ENSR00000251622 | 1:46851100   | CYP4Z2P     | 1:46900437-46843095 | 1   | 8005     | 0.8397 | >15         |
| LUAD        | ENSR00000251622 | 1:46851100   | CYP4B1      | 1:46757838-46819413 | 1   | 31687    | 0.8072 | >15         |
| LUAD        | ENSR00000251622 | 1:46851100   | CYP4Z2P     | 1:46900437-46843095 | 1   | 8005     | 0.7848 | >15         |
| OV          | ENSR00000251622 | 1:46851100   | CYP4B1      | 1:46757838-46819413 | 1   | 31687    | 0.749  | >15         |
| BLCA        | ENSR00000251622 | 1:46851100   | CYP4Z2P     | 1:46900437-46843095 | 1   | 8005     | 0.7482 | >15         |
| BRCA        | ENSR00000251622 | 1:46851100   | CYP4Z1      | 1:47067488-47118319 | 1   | 267219   | 0.7169 | >15         |
| LUAD        | ENSR00000251622 | 1:46851100   | CYP4Z1      | 1:47067488-47118319 | 1   | 267219   | 0.6627 | >15         |
| OV          | ENSR00000251622 | 1:46851100   | CYP4Z1      | 1:47067488-47118319 | 1   | 267219   | 0.6285 | >15         |
| BLCA        | ENSR00000251622 | 1:46851100   | CYP4Z1      | 1:47067488-47118319 | 1   | 267219   | 0.6191 | >15         |
| BRCA        | ENSR00000251622 | 1:46851100   | CYP4X1      | 1:47023568-47050751 | 1   | 199651   | 0.6027 | >15         |
| BRCA        | ENSR00000251622 | 1:46851100   | CYP4A22     | 1:47137435-47149741 | 1   | 298641   | 0.6021 | >15         |
| LUAD        | ENSR00000251622 | 1:46851100   | CYP4A11     | 1:46941484-46929177 | 1   | 78077    | 0.5506 | >15         |
| BRCA        | ENSR00000251622 | 1:46851100   | CYP4A11     | 1:46941484-46929177 | 1   | 78077    | 0.5451 | >15         |
| BLCA        | ENSR00000251622 | 1:46851100   | CYP4A11     | 1:46941484-46929177 | 1   | 78077    | 0.5403 | >15         |
| OV          | ENSR00000251622 | 1:46851100   | CYP4A22     | 1:47137435-47149741 | 1   | 298641   | 0.5274 | >15         |
| BLCA        | ENSR00000251622 | 1:46851100   | FAAH        | 1:46394265-46413848 | 1   | 437252   | 0.5105 | >15         |
| LUAD        | ENSR00000251622 | 1:46851100   | CYP4X1      | 1:47023568-47050751 | 1   | 199651   | 0.4948 | >15         |
| BRCA        | ENSR00000251622 | 1:46851100   | CYP4B1      | 1:46757838-46819413 | 1   | 31687    | 0.486  | >15         |
| LUAD        | ENSR00000251622 | 1:46851100   | CYP4A22     | 1:47137435-47149741 | 1   | 298641   | 0.4655 | >15         |
| LUAD        | ENSR00000251622 | 1:46851100   | FAAH        | 1:46394265-46413848 | 1   | 437252   | 0.458  | >15         |
| BLCA        | ENSR00000251622 | 1:46851100   | CYP4X1      | 1:47023568-47050751 | 1   | 199651   | 0.4212 | >15         |
| OV          | ENSR00000251622 | 1:46851100   | CYP4A11     | 1:46941484-46929177 | 1   | 78077    | 0.4154 | 9.206239819 |
| BLCA        | ENSR00000251622 | 1:46851100   | CYP4A22     | 1:47137435-47149741 | 1   | 298641   | 0.4109 | >15         |
| LUAD        | ENSR00000251622 | 1:46851100   | ATPAF1      | 1:46673867-46632737 | 1   | 218363   | 0.3771 | >15         |
| LUAD        | ENSR00000251622 | 1:46851100   | TAL1        | 1:47232220-47216290 | 1   | 365190   | 0.371  | >15         |
| BRCA        | ENSR00000251622 | 1:46851100   | PIK3R3      | 1:46133036-46040140 | 1   | 810960   | 0.3471 | >15         |
| OV          | ENSR00000251622 | 1:46851100   | ATPAF1      | 1:46673867-46632737 | 1   | 218363   | 0.3453 | 6.174023683 |
| BRCA        | ENSR00000251622 | 1:46851100   | TSPAN1      | 1:46175073-46185958 | 1   | 665142   | 0.3109 | >15         |
| BLCA        | ENSR00000251622 | 1:46851100   | PIK3R3      | 1:46133036-46040140 | 1   | 810960   | 0.3023 | 8.147798935 |

BRCA: Breast invasive carcinoma; BLCA: Bladder Urothelial Carcinoma; OV: Ovarian serous cystadenocarcinoma; LUAD: Lung adenocarcinoma.

The target genes information of GTF2H2C (ENSR00000182109)

| Cancer Type | Enhancer Id     | Mid Location | Target Gene | Gene Location       | TSS | Distance | Rs     | -Log10FDR   |
|-------------|-----------------|--------------|-------------|---------------------|-----|----------|--------|-------------|
| LGG         | ENSR00000182109 | 5:71097436   | NAIP        | 5:71025114-70968483 | 5   | 128953   | 0.4008 | >15         |
| LGG         | ENSR00000182109 | 5:71097436   | SERF1A      | 5:70900665-70918530 | 5   | 178906   | 0.307  | 10.60745428 |

LGG: Brain Lower Grade Glioma.

The target genes information of PSMF1 (20:1141246-1147246)

| Cancer Type | Enhancer Id        | Mid Location | Target Gene | Gene Location      | TSS | Distance | Rs     | -Log10FDR    |
|-------------|--------------------|--------------|-------------|--------------------|-----|----------|--------|--------------|
| STAD        | 20:1141246-1147246 | 20:1144246   | STK35       | 20:2101611-2177038 | 20  | 957365   | 0.4502 | 0            |
| STAD        | 20:1141246-1147246 | 20:1144246   | CSNK2A1     | 20:543821-473591   | 20  | 600425   | 0.4432 | 0            |
| STAD        | 20:1141246-1147246 | 20:1144246   | TBC1D20     | 20:462553-435480   | 20  | 681693   | 0.4073 | 0            |
| STAD        | 20:1141246-1147246 | 20:1144246   | ZCCHC3      | 20:296968-300321   | 20  | 847278   | 0.3733 | 3.290282e-13 |
| STAD        | 20:1141246-1147246 | 20:1144246   | C20orf96    | 20:290778-270863   | 20  | 853468   | 0.3417 | 5.24085e-11  |

STAD: Stomach adenocarcinoma.

The target genes information of TNS4 (17:40489449-40495449)

| Cancer Type | Enhancer Id          | Mid Location | Target Gene | Gene Location        | TSS | Distance | Rs     | -Log10FDR             |
|-------------|----------------------|--------------|-------------|----------------------|-----|----------|--------|-----------------------|
| STAD        | 17:40489449-40495449 | 17:40492449  | TNS4        | 17:40501597-40475828 | 17  | 9148     | 0.8784 | 0                     |
| PAAD        | 17:40489449-40495449 | 17:40492449  | TNS4        | 17:40501597-40475828 | 17  | 9148     | 0.8657 | 7.59220619713681e-54  |
| READ        | 17:40489449-40495449 | 17:40492449  | TNS4        | 17:40501597-40475828 | 17  | 9148     | 0.8391 | 0                     |
| CESC        | 17:40489449-40495449 | 17:40492449  | TNS4        | 17:40501597-40475828 | 17  | 9148     | 0.83   | 1.79690941916321e-77  |
| BLCA        | 17:40489449-40495449 | 17:40492449  | TNS4        | 17:40501597-40475828 | 17  | 9148     | 0.8231 | 1.77998008881277e-104 |
| LUSC        | 17:40489449-40495449 | 17:40492449  | TNS4        | 17:40501597-40475828 | 17  | 9148     | 0.7857 | 6.26755584042288e-115 |
| HNSC        | 17:40489449-40495449 | 17:40492449  | TNS4        | 17:40501597-40475828 | 17  | 9148     | 0.5721 | 0                     |
| LUSC        | 17:40489449-40495449 | 17:40492449  | RAPGEFL1    | 17:40177010-40195656 | 17  | 315439   | 0.5208 | 5.45289675206652e-38  |
| READ        | 17:40489449-40495449 | 17:40492449  | MSL1        | 17:40122298-40136916 | 17  | 370151   | 0.5205 | 6.32969302481917e-06  |
| BLCA        | 17:40489449-40495449 | 17:40492449  | RAPGEFL1    | 17:40177010-40195656 | 17  | 315439   | 0.472  | 2.95812800710651e-23  |
| PAAD        | 17:40489449-40495449 | 17:40492449  | ERBB2       | 17:39687914-39730426 | 17  | 804535   | 0.411  | 2.96265881875012e-07  |
| LUSC        | 17:40489449-40495449 | 17:40492449  | KRT34       | 17:41382403-41377650 | 17  | 889954   | 0.4107 | 2.59633134512955e-22  |
| READ        | 17:40489449-40495449 | 17:40492449  | GSDMA       | 17:39953263-39977766 | 17  | 539186   | 0.4062 | 0.00092652            |
| PAAD        | 17:40489449-40495449 | 17:40492449  | GRB7        | 17:39737927-39747291 | 17  | 754522   | 0.3939 | 1.08575412727218e-06  |
| PAAD        | 17:40489449-40495449 | 17:40492449  | GSDMB       | 17:39919854-39904595 | 17  | 572595   | 0.3926 | 1.19281400967078e-06  |
| PAAD        | 17:40489449-40495449 | 17:40492449  | NR1D1       | 17:40100725-40092787 | 17  | 391724   | 0.3842 | 2.19612400321798e-06  |
| PAAD        | 17:40489449-40495449 | 17:40492449  | RAPGEFL1    | 17:40177010-40195656 | 17  | 315439   | 0.3803 | 2.88972264482997e-06  |
| LUSC        | 17:40489449-40495449 | 17:40492449  | NR1D1       | 17:40100725-40092787 | 17  | 391724   | 0.3788 | 8.51558355139561e-19  |
| READ        | 17:40489449-40495449 | 17:40492449  | CDC6        | 17:40287633-40304657 | 17  | 204816   | 0.3788 | 0.002350528           |
| LUSC        | 17:40489449-40495449 | 17:40492449  | MSL1        | 17:40122298-40136916 | 17  | 370151   | 0.3705 | 5.9775685551399e-18   |
| READ        | 17:40489449-40495449 | 17:40492449  | TOP2A       | 17:40417950-40388516 | 17  | 74499    | 0.3518 | 0.005426871           |
| READ        | 17:40489449-40495449 | 17:40492449  | KRTAP9-4    | 17:41249687-41250653 | 17  | 757238   | 0.3384 | 0.007602445           |
| BLCA        | 17:40489449-40495449 | 17:40492449  | KRT31       | 17:41397592-41393724 | 17  | 905143   | 0.3381 | 1.47726101059421e-11  |
| CESC        | 17:40489449-40495449 | 17:40492449  | RAPGEFL1    | 17:40177010-40195656 | 17  | 315439   | 0.3347 | 5.45541270606501e-08  |
| LUSC        | 17:40489449-40495449 | 17:40492449  | KRT33B      | 17:41369800-41363494 | 17  | 877351   | 0.3328 | 1.75545380533646e-14  |
| HNSC        | 17:40489449-40495449 | 17:40492449  | MSL1        | 17:40122298-40136916 | 17  | 370151   | 0.3228 | 4.10647177862099e-13  |
| LUSC        | 17:40489449-40495449 | 17:40492449  | KRT10       | 17:40822595-40818117 | 17  | 330146   | 0.322  | 1.36795637316005e-13  |
| READ        | 17:40489449-40495449 | 17:40492449  | KRTAP1-5    | 17:41027202-41026026 | 17  | 534753   | 0.3203 | 0.012618281           |
| LUSC        | 17:40489449-40495449 | 17:40492449  | KRT33A      | 17:41350812-41346092 | 17  | 858363   | 0.3089 | 1.5083559474837e-12   |
| LUSC        | 17:40489449-40495449 | 17:40492449  | KRT31       | 17:41397592-41393724 | 17  | 905143   | 0.3019 | 5.18743177014694e-12  |
| PAAD        | 17:40489449-40495449 | 17:40492449  | TOP2A       | 17:40417950-40388516 | 17  | 74499    | 0.3011 | 0.000356553           |

STAD: Stomach adenocarcinoma; PAAD: Pancreatic adenocarcinoma; READ: Rectum adenocarcinoma; CESC: Cervical squamous cell carcinoma and endocervical adenocarcinoma; BLCA: Bladder Urothelial Carcinoma; LUSC: Lung squamous cell carcinoma; HNSC: Head and Neck squamous cell carcinoma.

The drug response information of CASTOR2 (ENSR00000326772)

| <b>Id</b>       | <b>Location</b>     | <b>Drug</b>        | <b>Rs</b> | <b>FDR</b> | <b>Database</b> |
|-----------------|---------------------|--------------------|-----------|------------|-----------------|
| ENSR00000326772 | 7:74930000-74936000 | Docetaxel          | 0.3042    | 0          | GDSC            |
| ENSR00000326772 | 7:74930000-74936000 | selumetinib        | 0.244     | 0.0001     | GDSC            |
| ENSR00000326772 | 7:74930000-74936000 | Trametinib         | 0.243     | 0.0001     | GDSC            |
| ENSR00000326772 | 7:74930000-74936000 | PD-0325901         | 0.2415    | 0.0003     | GDSC            |
| ENSR00000326772 | 7:74930000-74936000 | RDEA119            | 0.233     | 0.0002     | GDSC            |
| ENSR00000326772 | 7:74930000-74936000 | RDEA119            | 0.2248    | 0.0007     | GDSC            |
| ENSR00000326772 | 7:74930000-74936000 | JNJ-26854165       | 0.217     | 0.001      | GDSC            |
| ENSR00000326772 | 7:74930000-74936000 | 17-AAG             | 0.2075    | 0.0026     | GDSC            |
| ENSR00000326772 | 7:74930000-74936000 | GSK1904529A        | 0.2004    | 0.0032     | GDSC            |
| ENSR00000326772 | 7:74930000-74936000 | AMG-706            | 0.1968    | 0.0056     | GDSC            |
| ENSR00000326772 | 7:74930000-74936000 | Elesclomol         | 0.1933    | 0.0112     | GDSC            |
| ENSR00000326772 | 7:74930000-74936000 | JNK Inhibitor VIII | 0.1928    | 0.0064     | GDSC            |
| ENSR00000326772 | 7:74930000-74936000 | CHIR-99021         | 0.1922    | 0.0096     | GDSC            |
| ENSR00000326772 | 7:74930000-74936000 | Bleomycin (50 uM)  | 0.1881    | 0.0038     | GDSC            |
| ENSR00000326772 | 7:74930000-74936000 | AP-24534           | 0.1848    | 0.0404     | GDSC            |
| ENSR00000326772 | 7:74930000-74936000 | CI-1040            | 0.1766    | 0.0118     | GDSC            |
| ENSR00000326772 | 7:74930000-74936000 | AZD6482            | 0.1744    | 0.0359     | GDSC            |
| ENSR00000326772 | 7:74930000-74936000 | HG-6-64-1          | 0.1693    | 0.0213     | GDSC            |
| ENSR00000326772 | 7:74930000-74936000 | Temsirolimus       | 0.1671    | 0.029      | GDSC            |
| ENSR00000326772 | 7:74930000-74936000 | FTI-277            | 0.161     | 0.0273     | GDSC            |
| ENSR00000326772 | 7:74930000-74936000 | XAV939             | 0.1599    | 0.0185     | GDSC            |
| ENSR00000326772 | 7:74930000-74936000 | Linifanib          | 0.1529    | 0.0391     | GDSC            |
| ENSR00000326772 | 7:74930000-74936000 | CCT007093          | 0.151     | 0.0392     | GDSC            |
| ENSR00000326772 | 7:74930000-74936000 | piperlongumine     | 0.1509    | 0.027      | GDSC            |
| ENSR00000326772 | 7:74930000-74936000 | BMS-708163         | 0.1484    | 0.0433     | GDSC            |
| ENSR00000326772 | 7:74930000-74936000 | (5Z)-7-Oxozeaenol  | 0.1461    | 0.0322     | GDSC            |
| ENSR00000326772 | 7:74930000-74936000 | I-BET-762          | -0.149    | 0.0426     | GDSC            |
| ENSR00000326772 | 7:74930000-74936000 | CAY10603           | -0.1559   | 0.0311     | GDSC            |
| ENSR00000326772 | 7:74930000-74936000 | BMS345541          | -0.1581   | 0.0224     | GDSC            |
| ENSR00000326772 | 7:74930000-74936000 | CUDC-101           | -0.1596   | 0.034      | GDSC            |
| ENSR00000326772 | 7:74930000-74936000 | XMD13-2            | -0.1682   | 0.021      | GDSC            |
| ENSR00000326772 | 7:74930000-74936000 | KIN001-102         | -0.1789   | 0.0065     | GDSC            |
| ENSR00000326772 | 7:74930000-74936000 | MP470              | -0.1796   | 0.0192     | GDSC            |
| ENSR00000326772 | 7:74930000-74936000 | NPK76-II-72-1      | -0.1811   | 0.0068     | GDSC            |
| ENSR00000326772 | 7:74930000-74936000 | Vorinostat         | -0.1852   | 0.011      | GDSC            |
| ENSR00000326772 | 7:74930000-74936000 | Belinostat         | -0.1869   | 0.0087     | GDSC            |
| ENSR00000326772 | 7:74930000-74936000 | LAQ824             | -0.1955   | 0.0039     | GDSC            |
| ENSR00000326772 | 7:74930000-74936000 | TAK-715            | -0.1959   | 0.0029     | GDSC            |
| ENSR00000326772 | 7:74930000-74936000 | AR-42              | -0.2077   | 0.0032     | GDSC            |

The drug response information of CYP4B1 (ENSR00000251622)

| <b>Id</b>       | <b>Location</b>     | <b>Drug</b>       | <b>Rs</b> | <b>FDR</b> | <b>Database</b> |
|-----------------|---------------------|-------------------|-----------|------------|-----------------|
| ENSR00000251622 | 1:46848100-46854100 | HG-5-113-01       | 0.3187    | 0.0019     | GDSC            |
| ENSR00000251622 | 1:46848100-46854100 | Foretinib         | 0.2717    | 0.0001     | GDSC            |
| ENSR00000251622 | 1:46848100-46854100 | AZD7762           | 0.253     | 0.0004     | GDSC            |
| ENSR00000251622 | 1:46848100-46854100 | RDEA119           | 0.2202    | 0.0004     | GDSC            |
| ENSR00000251622 | 1:46848100-46854100 | MPS-1-IN-1        | 0.2158    | 0.0039     | GDSC            |
| ENSR00000251622 | 1:46848100-46854100 | selumetinib       | 0.2149    | 0.0008     | GDSC            |
| ENSR00000251622 | 1:46848100-46854100 | Trametinib        | 0.1995    | 0.0015     | GDSC            |
| ENSR00000251622 | 1:46848100-46854100 | AP-24534          | 0.1936    | 0.0376     | GDSC            |
| ENSR00000251622 | 1:46848100-46854100 | PD-0332991        | 0.1831    | 0.0163     | GDSC            |
| ENSR00000251622 | 1:46848100-46854100 | BX-795            | 0.177     | 0.0323     | GDSC            |
| ENSR00000251622 | 1:46848100-46854100 | Bleomycin (50 uM) | 0.1761    | 0.0071     | GDSC            |
| ENSR00000251622 | 1:46848100-46854100 | CEP-701           | 0.1747    | 0.0415     | GDSC            |
| ENSR00000251622 | 1:46848100-46854100 | Camptothecin      | 0.1724    | 0.0331     | GDSC            |
| ENSR00000251622 | 1:46848100-46854100 | RDEA119           | 0.1695    | 0.0134     | GDSC            |
| ENSR00000251622 | 1:46848100-46854100 | HG-6-64-1         | 0.1679    | 0.0225     | GDSC            |
| ENSR00000251622 | 1:46848100-46854100 | CI-1040           | 0.1671    | 0.0176     | GDSC            |
| ENSR00000251622 | 1:46848100-46854100 | TPCA-1            | 0.1614    | 0.0182     | GDSC            |
| ENSR00000251622 | 1:46848100-46854100 | BMS-754807        | 0.1583    | 0.038      | GDSC            |
| ENSR00000251622 | 1:46848100-46854100 | Afatinib          | -0.1329   | 0.0395     | GDSC            |
| ENSR00000251622 | 1:46848100-46854100 | OSI-930           | -0.1594   | 0.0443     | GDSC            |
| ENSR00000251622 | 1:46848100-46854100 | WZ3105            | -0.175    | 0.0083     | GDSC            |
| ENSR00000251622 | 1:46848100-46854100 | THZ-2-49          | -0.1772   | 0.0085     | GDSC            |
| ENSR00000251622 | 1:46848100-46854100 | KIN001-102        | -0.1829   | 0.0054     | GDSC            |
| ENSR00000251622 | 1:46848100-46854100 | Afatinib          | -0.2128   | 0.0013     | GDSC            |

The drug response information of GTF2H2C (ENSR00000182109)

| <b>Id</b>       | <b>Location</b>     | <b>Drug</b>        | <b>Rs</b> | <b>FDR</b> | <b>Database</b> |
|-----------------|---------------------|--------------------|-----------|------------|-----------------|
| ENSR00000182109 | 5:71094436-71100436 | Gefitinib          | 0.3054    | 7.8057E-06 | GDSC            |
| ENSR00000182109 | 5:71094436-71100436 | Afatinib           | 0.2884    | 8.6218E-06 | GDSC            |
| ENSR00000182109 | 5:71094436-71100436 | Bosutinib          | 0.2744    | 0.0023     | GDSC            |
| ENSR00000182109 | 5:71094436-71100436 | Afatinib           | 0.2617    | 0          | GDSC            |
| ENSR00000182109 | 5:71094436-71100436 | Veliparib          | 0.2328    | 0.0009     | GDSC            |
| ENSR00000182109 | 5:71094436-71100436 | Docetaxel          | 0.2294    | 0.0008     | GDSC            |
| ENSR00000182109 | 5:71094436-71100436 | XAV939             | 0.2255    | 0.0007     | GDSC            |
| ENSR00000182109 | 5:71094436-71100436 | PD-0325901         | 0.2251    | 0.0008     | GDSC            |
| ENSR00000182109 | 5:71094436-71100436 | JNK Inhibitor VIII | 0.2221    | 0.0013     | GDSC            |
| ENSR00000182109 | 5:71094436-71100436 | CCT007093          | 0.2135    | 0.0019     | GDSC            |
| ENSR00000182109 | 5:71094436-71100436 | JNJ-26854165       | 0.2109    | 0.0013     | GDSC            |
| ENSR00000182109 | 5:71094436-71100436 | selumetinib        | 0.208     | 0.0012     | GDSC            |
| ENSR00000182109 | 5:71094436-71100436 | Lenalidomide       | 0.2054    | 0.0098     | GDSC            |
| ENSR00000182109 | 5:71094436-71100436 | selumetinib        | 0.1967    | 0.0063     | GDSC            |
| ENSR00000182109 | 5:71094436-71100436 | RDEA119            | 0.1937    | 0.0041     | GDSC            |
| ENSR00000182109 | 5:71094436-71100436 | RDEA119            | 0.1924    | 0.0024     | GDSC            |
| ENSR00000182109 | 5:71094436-71100436 | Trametinib         | 0.1901    | 0.0026     | GDSC            |
| ENSR00000182109 | 5:71094436-71100436 | 17-AAG             | 0.1884    | 0.0073     | GDSC            |
| ENSR00000182109 | 5:71094436-71100436 | CP724714           | 0.1812    | 0.0184     | GDSC            |
| ENSR00000182109 | 5:71094436-71100436 | CI-1040            | 0.1803    | 0.01       | GDSC            |
| ENSR00000182109 | 5:71094436-71100436 | Bicalutamide       | 0.1725    | 0.0199     | GDSC            |
| ENSR00000182109 | 5:71094436-71100436 | Cetuximab          | 0.1681    | 0.0135     | GDSC            |
| ENSR00000182109 | 5:71094436-71100436 | FTI-277            | 0.1585    | 0.0303     | GDSC            |
| ENSR00000182109 | 5:71094436-71100436 | Bicalutamide       | 0.1562    | 0.0335     | GDSC            |
| ENSR00000182109 | 5:71094436-71100436 | Bleomycin (50 uM)  | 0.1362    | 0.0412     | GDSC            |
| ENSR00000182109 | 5:71094436-71100436 | BX-912             | -0.1482   | 0.0434     | GDSC            |
| ENSR00000182109 | 5:71094436-71100436 | TPCA-1             | -0.1553   | 0.0242     | GDSC            |
| ENSR00000182109 | 5:71094436-71100436 | Belinostat         | -0.1613   | 0.0291     | GDSC            |
| ENSR00000182109 | 5:71094436-71100436 | I-BET-762          | -0.1626   | 0.024      | GDSC            |
| ENSR00000182109 | 5:71094436-71100436 | CAY10603           | -0.1914   | 0.0063     | GDSC            |
| ENSR00000182109 | 5:71094436-71100436 | NPK76-II-72-1      | -0.1921   | 0.0039     | GDSC            |
| ENSR00000182109 | 5:71094436-71100436 | AR-42              | -0.194    | 0.0059     | GDSC            |

The drug response information of TNS4 (17:40489449-40495449)

| <b>Id</b>            | <b>Location</b>      | <b>Drug</b>        | <b>Rs</b> | <b>FDR</b> | <b>Database</b> |
|----------------------|----------------------|--------------------|-----------|------------|-----------------|
| 17:40489449-40495449 | 17:40489449-40495449 | GSK269962A         | 0.2702    | 0          | GDSC            |
| 17:40489449-40495449 | 17:40489449-40495449 | TW 37              | 0.2456    | 0.0001     | GDSC            |
| 17:40489449-40495449 | 17:40489449-40495449 | GSK429286A         | 0.2366    | 0.0002     | GDSC            |
| 17:40489449-40495449 | 17:40489449-40495449 | CEP-701            | 0.2193    | 0.0018     | GDSC            |
| 17:40489449-40495449 | 17:40489449-40495449 | Camptothecin       | 0.2149    | 0.0024     | GDSC            |
| 17:40489449-40495449 | 17:40489449-40495449 | FK866              | 0.2087    | 0.0018     | GDSC            |
| 17:40489449-40495449 | 17:40489449-40495449 | UNC0638            | 0.2026    | 0.0022     | GDSC            |
| 17:40489449-40495449 | 17:40489449-40495449 | SN-38              | 0.1996    | 0.0027     | GDSC            |
| 17:40489449-40495449 | 17:40489449-40495449 | TL-1-85            | 0.1914    | 0.0042     | GDSC            |
| 17:40489449-40495449 | 17:40489449-40495449 | piperlongumine     | 0.1887    | 0.005      | GDSC            |
| 17:40489449-40495449 | 17:40489449-40495449 | BX-795             | 0.1869    | 0.0103     | GDSC            |
| 17:40489449-40495449 | 17:40489449-40495449 | PI-103             | 0.1847    | 0.0064     | GDSC            |
| 17:40489449-40495449 | 17:40489449-40495449 | AZD7762            | 0.1772    | 0.0157     | GDSC            |
| 17:40489449-40495449 | 17:40489449-40495449 | Vinblastine        | 0.169     | 0.0223     | GDSC            |
| 17:40489449-40495449 | 17:40489449-40495449 | (5Z)-7-Oxozeaenol  | 0.1676    | 0.0153     | GDSC            |
| 17:40489449-40495449 | 17:40489449-40495449 | TG101348           | 0.1657    | 0.0159     | GDSC            |
| 17:40489449-40495449 | 17:40489449-40495449 | BX-912             | 0.1623    | 0.0185     | GDSC            |
| 17:40489449-40495449 | 17:40489449-40495449 | Talazoparib        | 0.1587    | 0.0237     | GDSC            |
| 17:40489449-40495449 | 17:40489449-40495449 | Etoposide          | 0.1576    | 0.0249     | GDSC            |
| 17:40489449-40495449 | 17:40489449-40495449 | Vorinostat         | 0.1555    | 0.0384     | GDSC            |
| 17:40489449-40495449 | 17:40489449-40495449 | OSI-027            | 0.1542    | 0.0274     | GDSC            |
| 17:40489449-40495449 | 17:40489449-40495449 | Genentech Cpd 10   | 0.1538    | 0.0271     | GDSC            |
| 17:40489449-40495449 | 17:40489449-40495449 | Y-39983            | 0.1478    | 0.0351     | GDSC            |
| 17:40489449-40495449 | 17:40489449-40495449 | JW-7-24-1          | 0.1438    | 0.0416     | GDSC            |
| 17:40489449-40495449 | 17:40489449-40495449 | HG-6-64-1          | 0.142     | 0.0477     | GDSC            |
| 17:40489449-40495449 | 17:40489449-40495449 | GW-2580            | -0.1414   | 0.0459     | GDSC            |
| 17:40489449-40495449 | 17:40489449-40495449 | EKB-569            | -0.1428   | 0.0433     | GDSC            |
| 17:40489449-40495449 | 17:40489449-40495449 | BMS-708163         | -0.1437   | 0.0418     | GDSC            |
| 17:40489449-40495449 | 17:40489449-40495449 | XAV939             | -0.1467   | 0.039      | GDSC            |
| 17:40489449-40495449 | 17:40489449-40495449 | Bicalutamide       | -0.1473   | 0.0437     | GDSC            |
| 17:40489449-40495449 | 17:40489449-40495449 | CH5424802          | -0.1476   | 0.0363     | GDSC            |
| 17:40489449-40495449 | 17:40489449-40495449 | AKT inhibitor VIII | -0.1528   | 0.0307     | GDSC            |
| 17:40489449-40495449 | 17:40489449-40495449 | Lisitinib          | -0.1573   | 0.026      | GDSC            |
| 17:40489449-40495449 | 17:40489449-40495449 | CCT007093          | -0.1579   | 0.0237     | GDSC            |
| 17:40489449-40495449 | 17:40489449-40495449 | BMS-536924         | -0.1599   | 0.0214     | GDSC            |
| 17:40489449-40495449 | 17:40489449-40495449 | GSK1904529A        | -0.1649   | 0.0183     | GDSC            |
| 17:40489449-40495449 | 17:40489449-40495449 | Linifanib          | -0.1702   | 0.0128     | GDSC            |
| 17:40489449-40495449 | 17:40489449-40495449 | SGC0946            | -0.1899   | 0.0052     | GDSC            |
| 17:40489449-40495449 | 17:40489449-40495449 | JNK Inhibitor VIII | -0.1965   | 0.0065     | GDSC            |
| 17:40489449-40495449 | 17:40489449-40495449 | Bicalutamide       | -0.2022   | 0.0027     | GDSC            |



---

|                      |                      |            |         |           |      |
|----------------------|----------------------|------------|---------|-----------|------|
| 17:40489449-40495449 | 17:40489449-40495449 | BMS-708163 | -0.2071 | 0.0017    | GDSC |
| 17:40489449-40495449 | 17:40489449-40495449 | CP724714   | -0.2377 | 0.0002    | GDSC |
| 17:40489449-40495449 | 17:40489449-40495449 | Gefitinib  | -0.2585 | 0.0002    | GDSC |
| 17:40489449-40495449 | 17:40489449-40495449 | Cetuximab  | -0.3145 | 6.3214e-7 | GDSC |
| 17:40489449-40495449 | 17:40489449-40495449 | Afatinib   | -0.3253 | 8.7157e-8 | GDSC |
| 17:40489449-40495449 | 17:40489449-40495449 | Afatinib   | -0.3476 | 6.0176e-8 | GDSC |

---
