# Supplementary material for: Prognostic Ability of Enhancer RNAs in Metastasis of Non-Small Cell Lung Cancer
Source: Molecules. 2022 Jun 26;27(13):4108. doi: 10.3390/molecules27134108 (PMC9268450; doi:10.3390/molecules27134108)
Supplement: Supplementary file 1 [file molecules-27-04108-s001.zip]

Archive with 25 entries (25 files):
- Figure S1.tif
- Figure S10.tif
- Figure S11.tif
- Figure S12.tif
- Figure S13.tif
- Figure S14.tif
- Figure S15.tif
- Figure S16.tif
- Figure S17.tif
- Figure S18.tif
- Figure S19.tif
- Figure S2.tif
- Figure S20.tif
- Figure S21.tif
- Figure S22.tif
- Figure S23.tif
- Figure S3.tif
- Figure S4.tif
- Figure S5.tif
- Figure S6.tif
- Figure S7.tif
- Figure S8.tif
- Figure S9.tif
- Table S1.pdf
- Table S2.pdf
